# Supplementary material for: Development and evaluation of a system of proxy data assimilation for paleoclimate reconstruction
Source: Copernicus journal article supplement (doi:10.5194/cp-13-379-2017), 2017-04-20
Supplement: Supplementary file 1 [file cp-13-379-2017-supplement.zip]

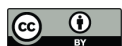

## *Supplement of*

# **Development and evaluation of a system of proxy data assimilation for paleoclimate reconstruction**

**Atsushi Okazaki and Kei Yoshimura**

*Correspondence to:* Atsushi Okazaki (atsushi.okazaki@riken.jp)

- cp-13-379-2017-supplement-title-page.pdf
- okazaki\_2016\_cp\_append.xlsx

The copyright of individual parts of the supplement might differ from the CC-BY 3.0 licence.
